# Supplementary material for: Semiconducting α′-boron sheet with high mobility and low all-boron contact resistance: a first-principles study
Source: Royal Society of Chemistry journal article supplement (doi:10.1039/d1nr00329a), 2021-01-01
Supplement: d1nr00329a1.pdf [file d1nr00329a1.pdf]

Supporting Information for  
Semiconducting  $\alpha'$ -boron sheet with high mobility and low  
all-boron contact resistance: A first-principles study

*Jun-Jie Zhang<sup>1</sup>, Tariq Altalhi<sup>2</sup>, Ji-Hui Yang<sup>1\*</sup>, and Boris I. Yakobson<sup>2,3\*</sup>*

<sup>1</sup>Department of Material Science & NanoEngineering, Rice University, Houston, Texas 77005, United

States

<sup>2</sup>Chemistry Department, Taif University, Taif, Saudi Arabia

<sup>3</sup>Department of Chemistry, Rice University, Houston, Texas 77005, United States

Email: [jhyang04@fudan.edu.cn](mailto:jhyang04@fudan.edu.cn); [biy@rice.edu](mailto:biy@rice.edu)

**I. GW0 results for  $\alpha$ - and  $\alpha'$ -boron sheet**

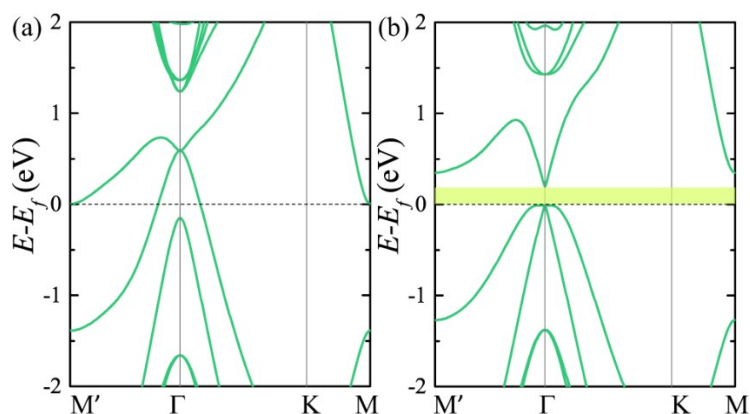

**Figure S1.** GW0 results for (a)  $\alpha$ -boron sheet and (b)  $\alpha'$ -boron sheet. Cyan donates the band gap in  $\alpha'$ -boron sheet.

## II. More TB model results for $\alpha$ - and $\alpha'$ -boron

The total Hamiltonian with nearest-neighbor, ( $8 \times 8$  matrix)

$$H = \begin{bmatrix} h_{11} & h_{12} & 0 & h_{14} & 0 & h_{16} & h_{17} & h_{18} \\ h_{21} & h_{22} & h_{23} & 0 & h_{25} & 0 & h_{27} & h_{28} \\ 0 & h_{32} & h_{33} & h_{34} & 0 & h_{36} & h_{37} & h_{38} \\ h_{41} & 0 & h_{43} & h_{44} & h_{45} & 0 & h_{47} & h_{48} \\ 0 & h_{52} & 0 & h_{54} & h_{55} & h_{56} & h_{57} & h_{58} \\ h_{61} & 0 & h_{63} & 0 & h_{65} & h_{66} & h_{67} & h_{68} \\ h_{71} & h_{72} & h_{73} & h_{74} & h_{75} & h_{76} & h_{77} & 0 \\ h_{81} & h_{82} & h_{83} & h_{84} & h_{85} & h_{86} & 0 & h_{88} \end{bmatrix}$$

note that some elements are zero, indicating they don't belong to nearest-neighbor. The selected

lattice vector are  $a_1 = a(1 \ 0)$ ,  $a_2 = a(-\frac{1}{2} \ \frac{\sqrt{3}}{2})$ . For example, there are five nearest-neighbor

atoms for B1 atom, which are B2, B4, B6, B7 and B8. The corresponding translation vectors

from B1 to its nearest-neighbor boron are  $\delta_{12} = a(\frac{\sqrt{3}}{2} \ \frac{3}{2})$ ,  $\delta_{14} = a(1 \ \frac{\sqrt{3}}{2})$ ,  $\delta_{16} = a(1 \ 0)$ ,

$\delta_{17} = a(\frac{1}{2} \ -\frac{\sqrt{3}}{2})$  and  $\delta_{18} = a(-1 \ 0)$ , where  $a$  is lattice constant of  $\alpha$ -boron sheet. Thus, their

Hamiltonian in reciprocal space can be read as following,

$$H_{12} = -\frac{t_1}{N} \sum_k e^{-ia(\frac{\sqrt{3}}{2}k_x + \frac{3}{2}k_y)} C_{k_2}^\dagger C_{k_1},$$

$$H_{14} = -\frac{t_3}{N} \sum_k e^{ia(k_x + \frac{\sqrt{3}}{2}k_y)} C_{k_4}^\dagger C_{k_1},$$

$$H_{16} = -\frac{t_3}{N} \sum_k e^{iak_x} C_{k_6}^\dagger C_{k_1},$$

$$H_{17} = -\frac{t_2}{N} \sum_k e^{ia(\frac{1}{2}k_x - \frac{\sqrt{3}}{2}k_y)} C_{k_7}^\dagger C_{k_1},$$

$$H_{18} = -\frac{t_2}{N} \sum_k e^{-iak_x} C_{k_8}^\dagger C_{k_1}.$$

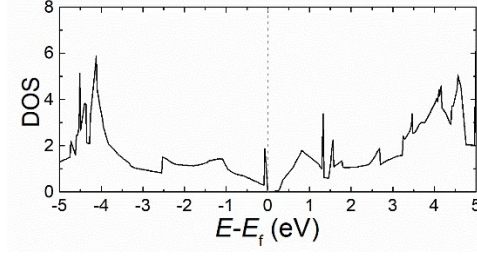

**Figure S2.** The DOS of semiconducting  $\alpha'$  boron sheet using HSE06 functional.

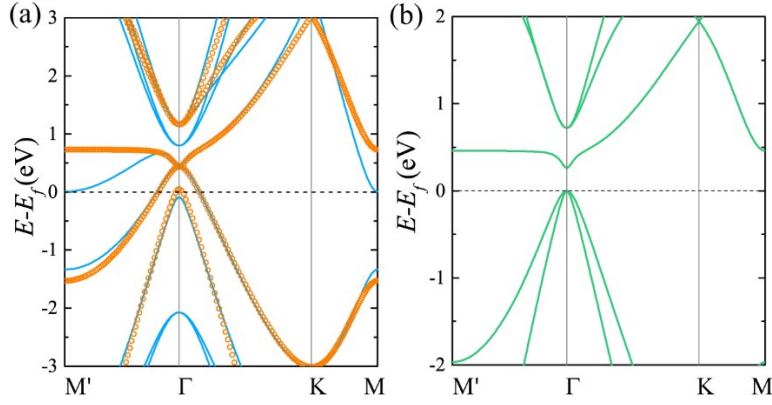

**Figure S3.** (a) TB model results for  $\alpha$ -boron sheet. Blue lines are HSE06 results. Orange circles donate TB model fitting results. (b) TB model results for  $\alpha'$ -boron sheet with  $t_2=1.4$  eV,  $\epsilon_2=-2.0$  eV.

### III. More carrier mobility results for $\alpha'$ - and $\beta^S_3$ boron sheet

Based on Boltzmann transport equations, the anisotropic electrical conductivity  $\sigma$  is expressed as following,

$$\sigma_{ij}(\mu, T) = \frac{e^2}{V} \int_{-\infty}^{+\infty} d\varepsilon \sum_{n,k} \left( -\frac{\partial f(\varepsilon, \mu, T)}{\partial \varepsilon} \right) v_i(n, k) v_j(n, k) \tau(n, k) \delta(\varepsilon - E_{n,k}),$$

where  $f(\varepsilon, \mu, T)$  is the usual Fermi-Dirac distribution function, defined as

$$f(\varepsilon, \mu, T) = \frac{1}{e^{(\varepsilon - \mu)/k_B T} + 1}$$

$E_{n,k}$  is the energy of the  $n$ -th band at  $k$ ,  $v_i(n, k)$  is the  $i$ -th component of the band velocity at  $(n, k)$ , and  $\tau$  is electron relaxation time. In addition, detailed description of the calculations of electrical conductivity can be found in *PRB*, 68, 125210 (2003) and *Comput. Phys. Commun.* 2008, 178, 685–699. In this work, we fitted  $\tau$  from the calculated hole mobility of  $\alpha'$ -boron sheet with Eq. (4) in main text, which is about 90 fs (Figure S3).

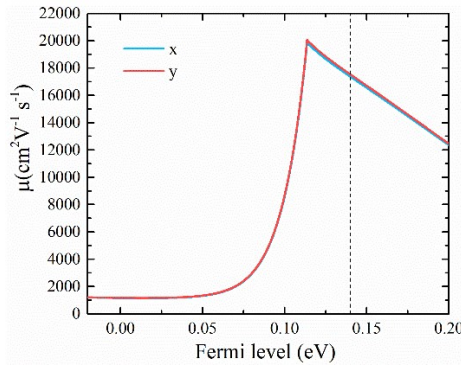

**Figure S4.** Carrier mobility for  $\alpha'$ -boron sheet using  $\mu = \sigma / ne$  along  $\Gamma$ -M' ( $x$ ) and  $\Gamma$ -K ( $y$ ).

Note that the electron mobility is inaccurate, which is caused by the small band gap in  $\alpha'$ -boron sheet.

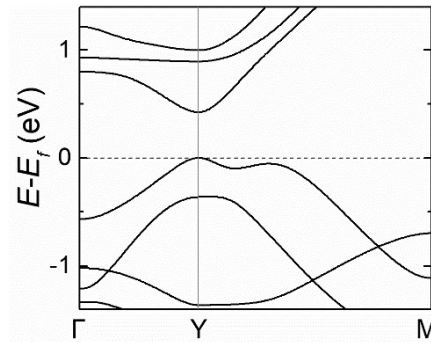

**Figure S5.** The band structure of semiconducting  $\beta_3^S$  boron sheet using HSE06 functional.

#### IV. The structures of selected metallic boron sheet

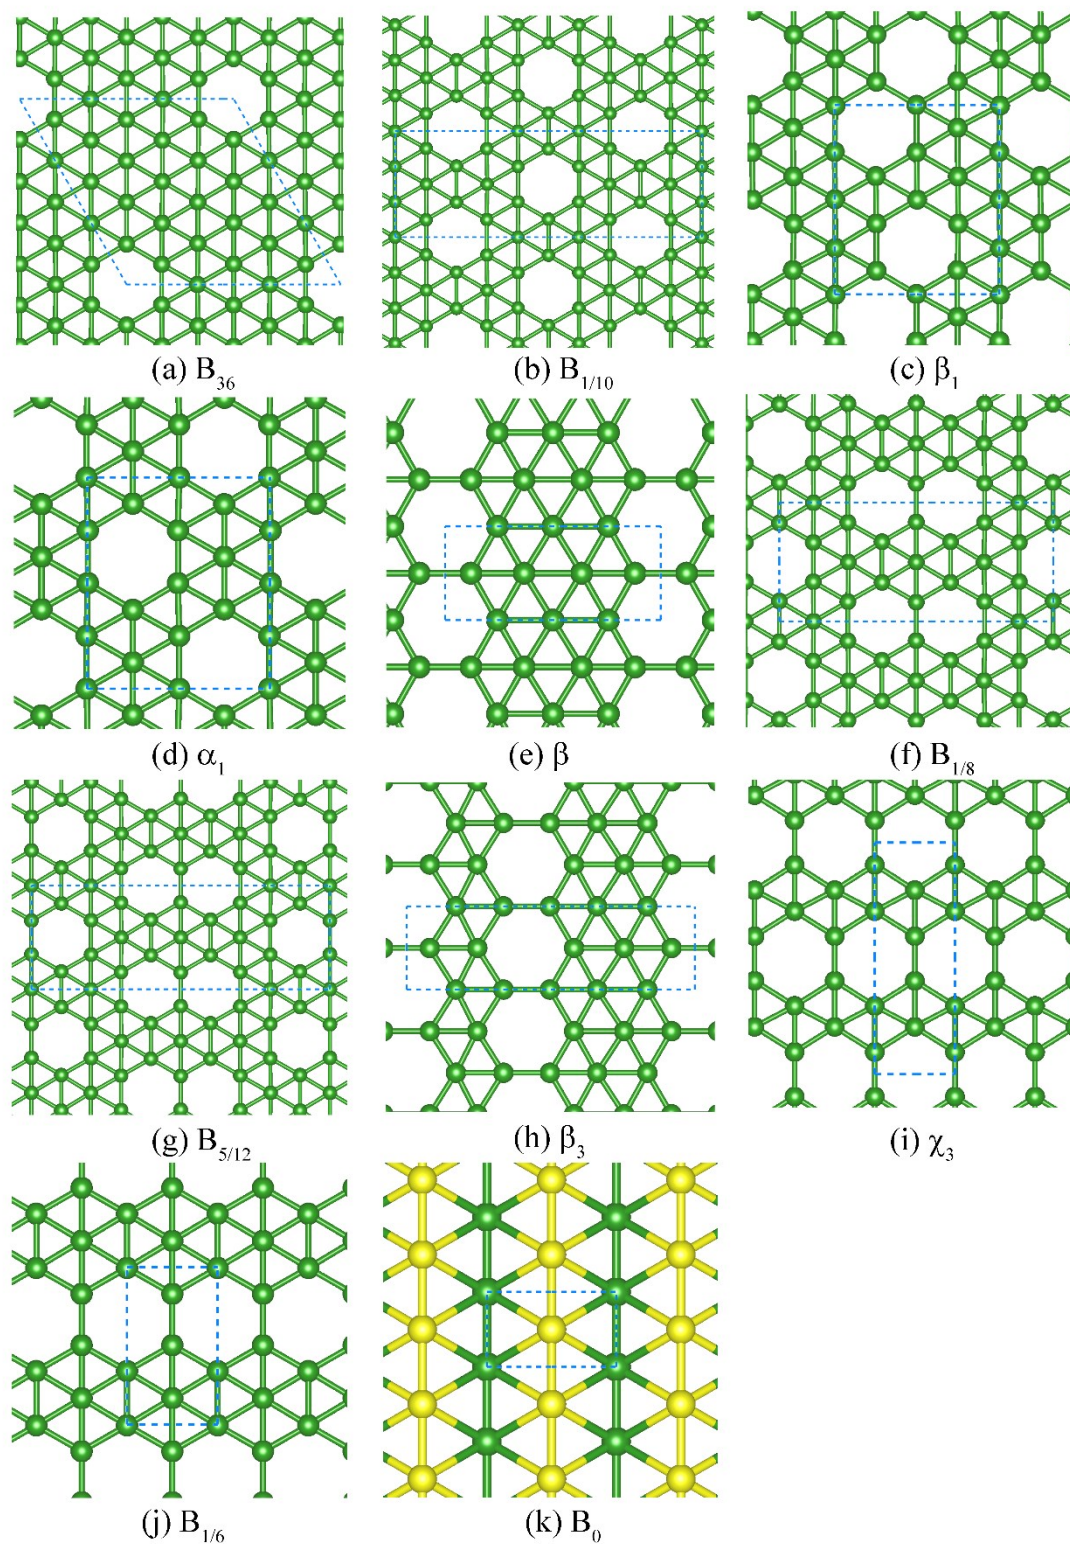

**Figure S6.** Selected stable metallic boron sheet for Schottky barrier calculations. Blue frames donate the selected unit cell. Yellow atoms indicate boron atoms moving outward/inward from the plane.
